# Supplementary material for: Intracranial human recordings reveal association between neural activity and perceived intensity for the pain of others in the insula
Source: eLife. 2022 Nov 3;11:e75197. doi: 10.7554/eLife.75197 (PMC9678359; doi:10.7554/eLife.75197)
Supplement: Figure 1—source data 1. — In black, the MNI coordinates resulting from the average MNI coordinates of the two adjacent electrodes used for re-referencing for all macroelectrodes. In gray, the MNI coordinates of the microelectrodes. The color coding and patient identifiers reflect those used in Figure 1c. [file elife-75197-fig1-data1.xlsx]

## Sheet: Sheet1
	Patient ID	X	Y	Z			Patient ID	X	Y	Z			Patient ID	X	Y	Z			Patient ID	X	Y	Z
	A	28.5	12	-12			C	38	-1.5	-8			E	38	-5.5	-6			G	40	6	-8
	A	29	15	-8			C	38	-4.5	-4			E	38	-8.5	-2			G	39	7	-2
	A	29.5	17.5	-4			C	38	-7.5	0			E	37	-11	2.5			G	38	9	3.5
	A	30	20.5	0			C	38	-10.5	5			E	36	-14	7			G	39.5	-3	-8.5
	A	30	23	4			C	37.5	-13.5	10			E	35	-17	11			G	38.5	-6	-4
	B	38.5	6	-12			C	36.5	-16	14.5			E	34	-20	15.5			G	37	-9	0
	B	38.5	8.5	-7.5			C	-34	2	-19			E	40	-1	-14			G	35.5	-11	4.5
	B	37	11	-2.5			C	39	2	-15			F	38.5	5	-13			G	34.5	-13	9.5
	B	36	14	2			D	-35	-6	-6.5			F	39	7	-8			G	34	-15.5	15
	B	36	17	6			D	-35	-7	-1.5			F	39.5	9	-3			G	-38	1	-10.5
	B	-41	-5.5	-7.5			D	-35	-8	3.5			F	40	11	2			G	-37	3.5	-5.5
	B	-40.5	-2.5	-2.5			D	-34.5	-9	9			F	36	-9	-5			G	-35.5	6.5	-1
	B	-39	0.5	2			D	-33.5	-10	14			F	36	-11	0			G	-34.5	9	3.5
	B	-37	3	7			D	-37	12	-8.5			F	36	-13	5			G	-33.5	11	9
	B	40	-4.5	-12			D	-36.5	15	-4.5			F	36	-14.5	10.5			G	-36.5	-11	-7.5
	B	39	-7.5	-7.5			D	-36	18	-1			F	36	-16	15.5			G	-35.5	-13	-2
	B	37	-10.5	-2.5			D	40	-5	-13.5			F	-33.5	12	-13			G	-35	-14.5	3.5
	B	36	-13	2			D	39.5	-7	-8.5			F	-32.5	16	-8			G	-35	-16	9
	B	36	-15.5	6			D	39	-9.5	-4			F	-32	21	-4			G	-34.5	-18	15
	B	35	-18.5	10.5			D	38.5	-12.5	0			F	-32	26	0.5
	B	33.5	-21	15.5			D	38	-15	4.5			F	-36	3.5	-15.5
							D	38	-17	9.5			F	-35.5	2	-11
							D	38	-19	14			F	-35	0	-4
							D	-37	8	-14			F	-35	-2	3
													F	-35	-4	9.5
