# Supplementary material for: Intracranial human recordings reveal association between neural activity and perceived intensity for the pain of others in the insula
Source: eLife. 2022 Nov 3;11:e75197. doi: 10.7554/eLife.75197 (PMC9678359; doi:10.7554/eLife.75197)
Supplement: Figure 5—source data 1. — The table indicates for each significant cluster the size in number of voxels of the cluster; the number of voxels of that clusters that have been assigned to cytoarchitectonic areas based on the Anatomy toolbox for SPM (http://www.fz-juelich.de/ime/spm_anatomy_toolbox); the number of voxels assigned expressed in percentage; the hemisphere covered by the cluster (L = left, R = right); the cytoarchitectonic area those voxels have been assigned to when the information is available, or the anatomical description of the area voxels fell in; the percentage of the cytoarchitectonic area covered by the assigned voxels; the t-values of the identified peaks of activity with the respective MNI coordinates. [file elife-75197-fig5-data1.xlsx]

## Sheet: Sheet1
Positive Regression with Intensity Coding for Hand t=3.19, p<0.001, FWEC=772
Cluster Size	Nr. Vxls	% vxls assigned	Hem	Cito or Anatomical Region	% Ara Activated	T-val	x	y	z
9115	299.5	3.3	L	Area Fp1	16.6	4.75	-22	56	-12
	206.8	2.3	L	Area 44	23.6
	95.1	1	L	Thal: Prefrontal	15.1
	90.3	1	L	Thal: Temporal	17
	37.3	0.4	L	Area 45	5.3	5.54	-50	20	-2
	23.6	0.3	L	Area Fo2	2.3
	18.5	0.2	R	Area 33	8.5
	14.3	0.2	L	Area 33	6.7
	12.9	0.1	R	Thal: Prefrontal	2.3
			L	IFG (p. Orbitalis)		5.78	-34	30	-8
						5.78	-38	30	-6
						5.73	-44	22	-2
			R	Caudate Nucleus		4.81	20	24	-2
			L	Superior Orbital Gyrus		4.76	-20	52	-12
1590	432.1	27.2	R	Lobule VIIa crusI (Hem)	13.3	4.05	42	-56	-32
						4.02	46	-58	-32
						3.81	30	-70	-26
	394.8	24.8	R	Lobule VI (Hem)	21.9	3.98	32	-58	-28
						3.77	24	-66	-30
	128.8	8.1	R	Lobule VIIb (Hem)	19.7	4.79	46	-54	-60
	73.8	4.6	R	Lobule VIIa crusII (Hem)	5.2
	64.1	4	R	Area FG2	19.7
	32	2	R	Lobule VI (Verm)	13.8
	21.1	1.3	R	Area hOc4v [V4(v)]	3.4
	16	1	R	Area FG1	6.4
772	249.6	32.3	R	Area 45	24.2	4.68	60	24	0
						3.67	64	20	18
				IFG (p. Orbitalis)		4.46	42	26	-10
						4.44	44	28	-8
						4.02	58	38	-8
Negative Regression with Intensity Coding for Hand t=3.19, p<0.001, FWEC=602
2883	383.6	13.3	R	Area hOc4la	43.3	4.06	48	-72	-6
	208.3	7.2	R	Area FG4	42.5	4.22	36	-42	-20
	207.6	7.2	R	Area FG3	31.7	4.21	40	-40	-24
	137.9	4.8	R	Area hOc4v [V4(v)]	22.2	4.55	46	-82	-20
	102.4	3.6	R	Area hOc3v [V3v]	12
	84.8	2.9	R	Subiculum	22.3	5.08	22	-36	-10
	82.1	2.8	R	CA1 (Hippocampus)	28.4
	81.5	2.8	R	Amygdala (LB)	38.2
	72.1	2.5	R	Area FG2	22.2
	50.5	1.8	R	Area hOc4lp	9
	43.4	1.5	R	Amygdala (SF)	91.1
	40.6	1.4	R	Lobule I IV (Hem)	8.1	4.92	4	-42	-4
	27.6	1	R	Thal: Parietal	8.3
	24.5	0.8	R	Area hOc5 [V5/MT]	42.1
	19.8	0.7	L	Lobule I IV (Hem)	4.1	4.34	-2	-46	-2
	18.5	0.6	R	Thal: Temporal	3.4
	14	0.5	R	Lobule V (Hem)	1.8
	12.9	0.4	R	Area hOc1 [V1]	0.6
	10.5	0.4	R	HATA Region	48
	10.4	0.4	R	Area hOc2 [V2]	1
	10.4	0.4	R	Amygdala (CM)	37.9
			R	Lingual Gyrus		4.2	22	-86	-4
2277	363.9	16	R	Area 4a	33.4	3.41	30	-34	70
	137.5	6	R	Area 3b	21.9	3.39	34	-34	58
	114.9	5	L	Area 1	20.2
	108.9	4.8	R	Area 1	15.5
	74.8	3.3	L	Area 5L (SPL)	10.8
	71.6	3.1	L	Area 4a	7.7
	66.1	2.9	L	Area 5M (SPL)	13.6
	60.9	2.7	R	Area 5L (SPL)	8.3
	38.5	1.7	L	Area 2	7.3
	17.6	0.8	R	Area 5M (SPL)	6
	17.4	0.8	R	Area 2	2.7
	16.4	0.7	L	Area 3b	2.9
	14.9	0.7	R	Area 4p	4.8
			R	Paracentral Lobule		4.48	4	-38	80
						3.61	2	-18	80
			R	Posterior-Medial Frontal		3.42	14	-10	68
			L	Postcentral Gyrus		3.41	-22	-36	82
626	14.3	2.3	R	Area OP3 [VS]	6.8
	7.5	1.2	R	Area 3a	3.7
	3.8	0.6	R	Area 3b	0.6
	0.1	0	R	Area OP1 [SII]	0
604	319.1	52.8	L	Area hOc4la	37.3	3.77	-42	-82	-16
						3.73	-48	-78	0
	42.4	7	L	Area FG2	8.3	3.66	-42	-74	-12
						3.64	-38	-72	-8
	28.9	4.8	L	Area hOc4v [V4(v)]	4
	23.8	3.9	L	Area hOc5 [V5/MT]	29.5	3.66	-40	-74	-4
	10.4	1.7	L	Area hOc4lp	1.2
